# Supplementary material for: Improving LMOF luminescence quantum yield through guest-mediated rigidification
Source: Royal Society of Chemistry journal article supplement (doi:10.1039/c9tc05216j), 2019-01-01
Supplement: c9tc05216j1.pdf [file c9tc05216j1.pdf]

## SUPPORTING INFORMATION

### Improving LMOF Luminescence Quantum Yield through Guest-Mediated Rigidification

William P. Lustig,<sup>a</sup> Simon J. Teat,<sup>b</sup> and Jing Li\*,<sup>a</sup>

<sup>a</sup> Chemistry & Chemical Biology, Rutgers University, 123 Bevier Rd, Piscataway, NJ 08854

<sup>b</sup> Advanced Light Source, Lawrence Berkeley National Laboratory, Berkeley, CA 94720, USA

\* Email: jingli@rutgers.edu

#### Table of Contents

|                                        |   |
|----------------------------------------|---|
| S1. Single crystal data.....           | 2 |
| S2. Photoluminescence data.....        | 3 |
| S3. Thermogravimetric analysis.....    | 4 |
| S4. Powder X-ray diffraction data..... | 5 |

## S1. LMOF-263 single crystal data

All non-hydrogen atoms were refined anisotropically. Hydrogen atoms were placed geometrically, then constrained and refined using a riding model. Displacement parameter restraints were used in the modeling of the disorder in the bipyridine ligand. Once the modelling of the framework was complete attempts were made to locate the solvent molecules (DMA) and water. However, no meaningful molecules could be found in the difference map, so SQUEEZE was used. SQUEEZE reported Solvent Accessible Volume of 2361 Å<sup>3</sup>, and Electrons Found in S.A.V. to be 570. This number of electrons would equate to around 12 DMA molecules. As this was approximated from x-ray data and could be partially due to the presence of water, the 12 DMA have not been included in the chemical formula.

**Table S1.** Single crystal data for LMOF-263 at 100 K

| Compound                     | LMOF-263                                                                      |
|------------------------------|-------------------------------------------------------------------------------|
| Formula                      | C <sub>64</sub> H <sub>40</sub> N <sub>2</sub> O <sub>8</sub> Zn <sub>2</sub> |
| M                            | 1002.07                                                                       |
| Crystal system               | Triclinic                                                                     |
| Space group                  | P -1                                                                          |
| a/Å                          | 13.9511(6)                                                                    |
| b/Å                          | 16.5329(7)                                                                    |
| c/Å                          | 20.1599(9)                                                                    |
| α/o                          | 89.937(3)                                                                     |
| β/o                          | 82.221(2)                                                                     |
| γ/o                          | 88.827(2)                                                                     |
| V, Å <sup>3</sup>            | 4606.16(35)                                                                   |
| Z                            | 2                                                                             |
| Temperature (K)              | 100                                                                           |
| λ(radiation wavelength) Å    | 0.7749                                                                        |
| D, g/cm <sup>3</sup>         | 0.722459                                                                      |
| Reflections collected        | 39877                                                                         |
| R1 <sup>a</sup> [I > 2σ(I)]  | 0.0607                                                                        |
| wR2 <sup>b</sup> [I > 2σ(I)] | 0.1779                                                                        |
| Goodness-of-fit              | 0.983                                                                         |
| CCDC No.                     | 1947629                                                                       |

$$^a R1 = \sum |F_o - F_c| / \sum |F_o|$$

$$^b wR2 = \sum [w(F_o^2 - F_c^2)^2] / \sum w(F_o^2)^2^{1/2}$$

## S2. Photoluminescence data

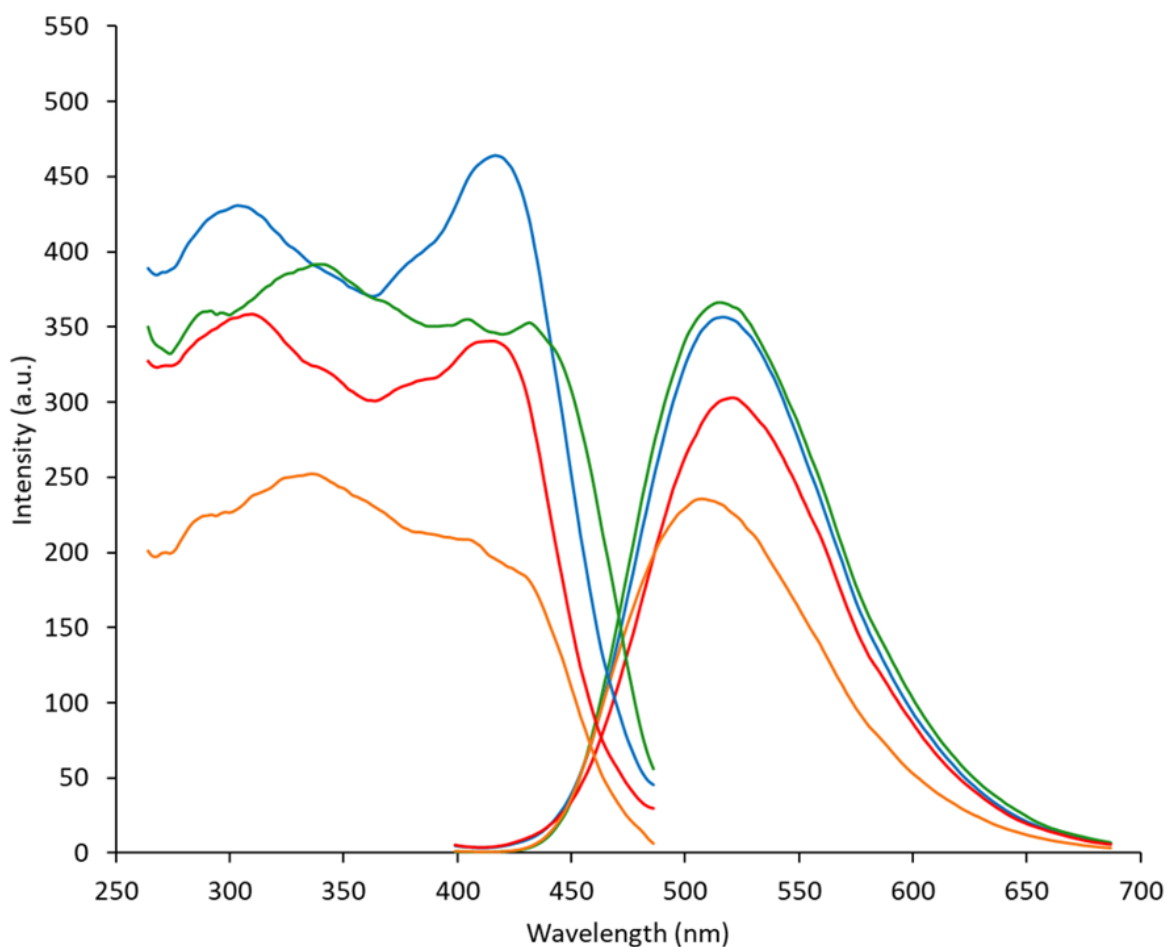

**Figure S1.** Excitation (left) and emission (right) spectra of outgassed LMOF-236 (blue), outgassed LMOF-301 (red), pentane-solvated LMOF-236 (green), and pentane-solvated LMOF-301 (gold). Excitation spectra were monitored at 520 nm emission, and emission spectra were collected under 455 nm excitation.

**Table S2.** Ligand quantum yield data

### S3. Thermogravimetric analysis

All thermogravimetric analysis data was collected using a TA Instruments Q5000 TGA. Samples were loaded into a Pt pan and heated under a constant dry N<sub>2</sub> flow of 20 mL/min. The temperature was gradually increased from ambient to 600 °C at a constant rate of 10 °C/min.

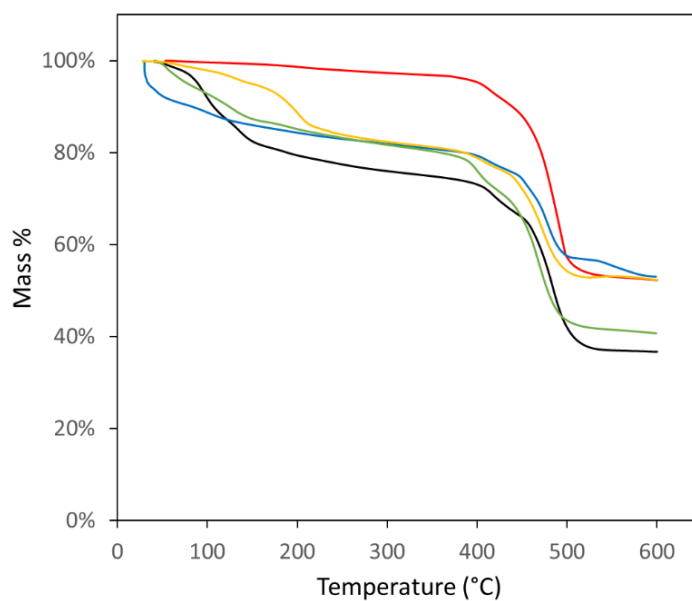

**Figure S2.** Thermogravimetric analysis data for LMOF-236 as made (black), outgassed (red), pentane-loaded (blue), cyclohexane-loaded (green), n-dodecane-loaded (yellow).

| Ligand                 | Internal quantum yield |
|------------------------|------------------------|
| H <sub>4</sub> tcbpe   | 62.3%                  |
| H <sub>4</sub> tcbpe-F | 46.5 %                 |

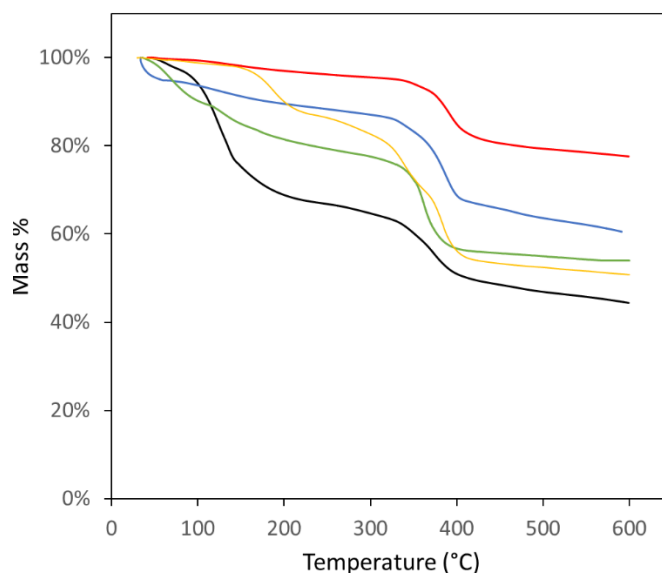

**Figure S3.** Thermogravimetric analysis data for LMOF-301 as made (black), outgassed (red), pentane-loaded (blue), cyclohexane-loaded (green), n-dodecane-loaded (yellow).

#### S4. Powder X-ray diffraction

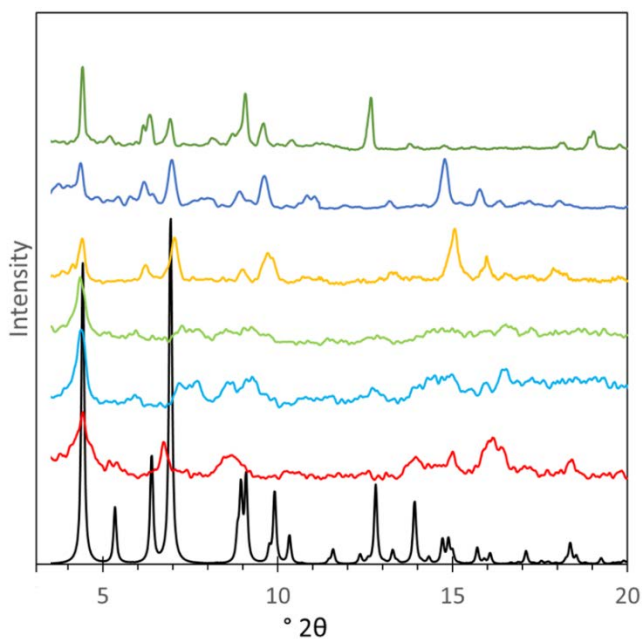

**Figure S4.** Powder X-ray diffraction patterns for as-made LMOF-263 (dark green), benzene-loaded LMOF-263 (dark blue), toluene-loaded LMOF-263 (gold), cyclohexane-loaded LMOF-263 (light green), n-dodecane-loaded LMOF-263 (light blue), and ethyl acetate-loaded LMOF-263 (red). The simulated pattern for LMOF-263 is shown in black.

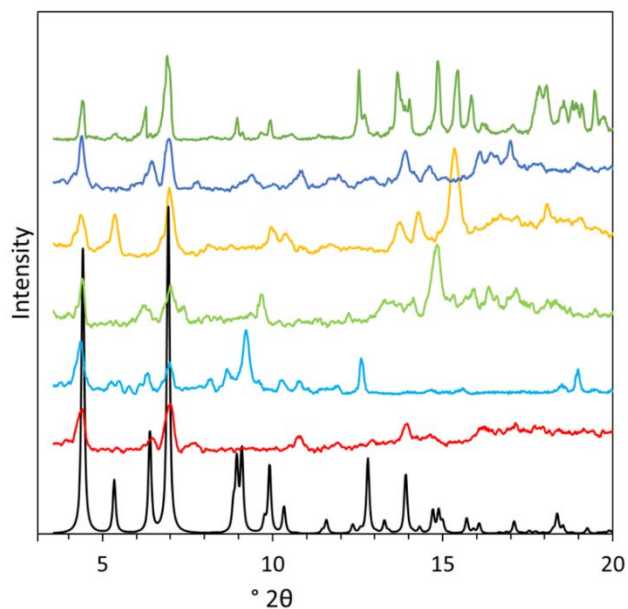

**Figure S5.** Powder X-ray diffraction patterns for as-made LMOF-301 (dark green), benzene-loaded LMOF-301 (dark blue), toluene-loaded LMOF-301 (gold), cyclohexane-loaded LMOF-301 (light green), n-dodecane-loaded LMOF-301 (light blue), and ethyl acetate-loaded LMOF-301 (red). The simulated pattern for LMOF-301 is shown in black.
